# Supplementary material for: A soluble salt-assisted facile synthetic route to semiconducting GaN nanoparticles
Source: Royal Society of Chemistry journal article supplement (doi:10.1039/b923920k), 2010-01-01
Supplement: b923920k.pdf [file b923920k.pdf]

## A Soluble Salts-Assisted Facile Synthetic Route to Semiconducting GaN Nanoparticles

Leshu Yu,<sup>\*a,b</sup> Yingying Lv,<sup>a</sup> Xiaolan Zhang,<sup>a</sup> Yu Zhao,<sup>b</sup> Yongliang Zhang,<sup>b</sup> Heyong Huang,<sup>c</sup> Yuying Feng<sup>c</sup>

*a: Department of Chemistry, Shangrao Normal University, 334000, Jiangxi, China*

*b: Key Laboratory of Mesoscopic Chemistry of MOE, School of Chemistry and Chemical Engineering, Nanjing University, 210093, Nanjing, China*

*c: Analysis and Testing Center, Nanjing Normal University, 210097, Nanjing, China*

RECEIVED DATE (automatically inserted by publisher); E-mail: [yuleshu2008@126.com](mailto:yuleshu2008@126.com)

**Index 1:** XRD patterns and TEM images of Ga<sub>2</sub>O<sub>3</sub>, ZnO, In<sub>2</sub>O<sub>3</sub> and SnO<sub>2</sub> NPs.

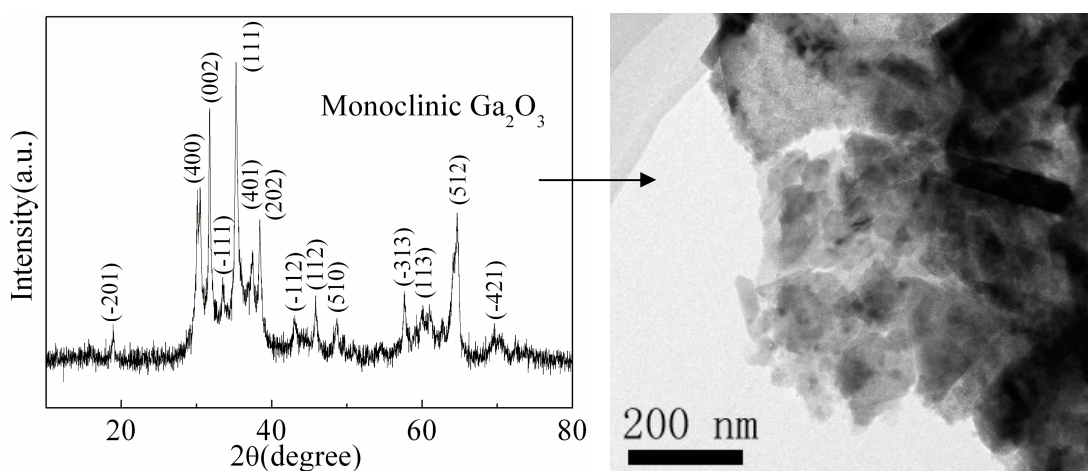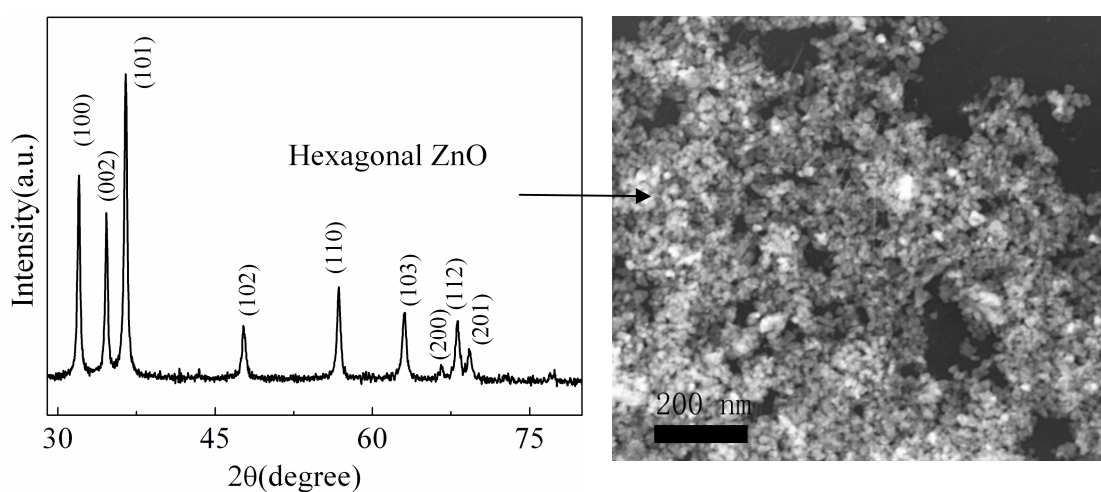

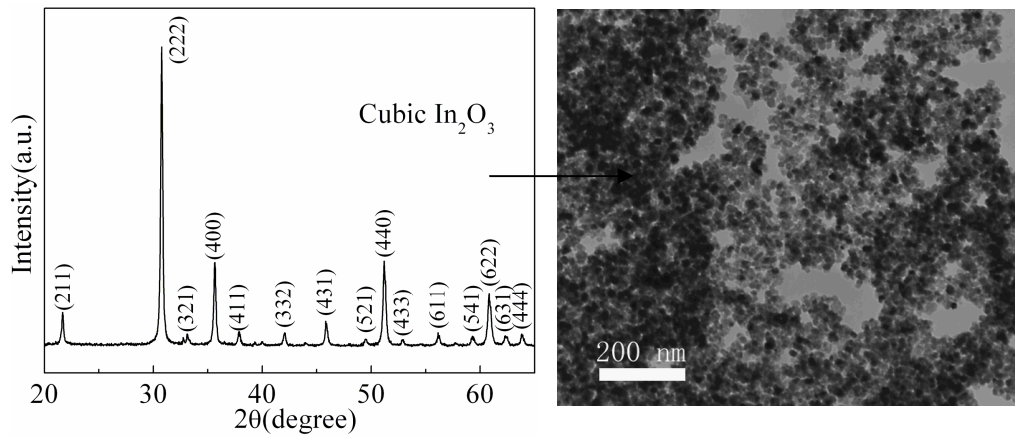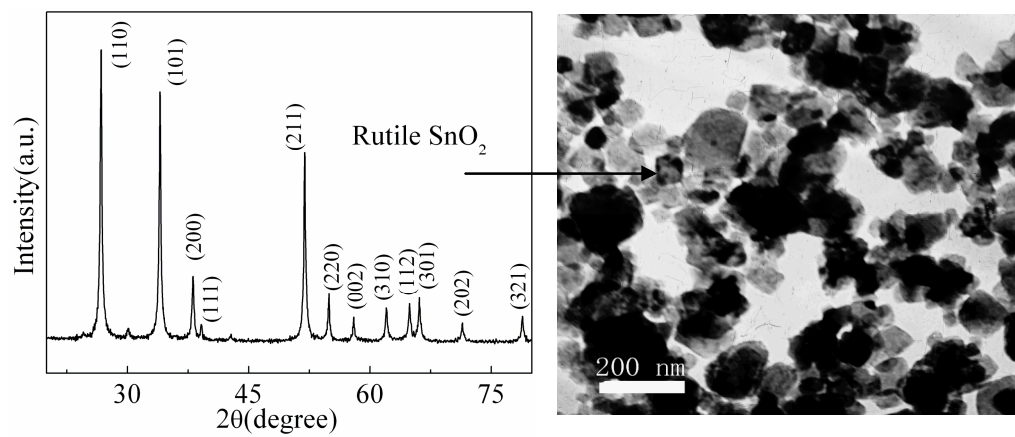

**Note:** The preparation process of  $\text{Ga}_2\text{O}_3$  NPs is similar to that of the GaN NPs just except the replacement of  $\text{NH}_3$  with air. Some other oxides nanostructures are prepared by ball-milling metal powder- $\text{Na}_2\text{SO}_4$  mixtures followed with the oxidation in air and washing with distilled water.
